# Supplementary material for: Ni/NiO/C hollow microspheres fabricated by a mist-CVD process using ethanolamine: an efficient OER catalyst
Source: Royal Society of Chemistry journal article supplement (doi:10.1039/d4nj00580e), 2024-01-01
Supplement: d4nj00580e1.pdf [file d4nj00580e1.pdf]

## Supplementary information

### **Ni/NiO/C hollow microspheres fabricated by Mist-CVD process with assistance of ethanolamine: An efficient OER catalyst**

Rong Tu <sup>a, b, c</sup>, Jiangwei Liu <sup>a, b</sup>, Yingqiu Zheng <sup>a, b, \*</sup>, Chao Song <sup>c, b</sup>, Chitengfei Zhang <sup>d, b</sup>, Yuzhe Han <sup>b</sup>, Rongchen Xu <sup>b</sup>, Guoqiang Luo <sup>a, b</sup>, Song Zhang <sup>a, b, d</sup>, Takashi Goto <sup>a, b</sup>

<sup>a</sup> State Key Laboratory of Advanced Technology for Materials Synthesis and Processing, Wuhan University of Technology, Wuhan 430070, China

<sup>b</sup> Chaozhou Branch of Chemistry and Chemical Engineering Guangdong Laboratory, Chaozhou 521000, China

<sup>c</sup> Hubei Technology Innovation Center for Advanced Composites, Wuhan University of Technology, Wuhan 430070, China

<sup>d</sup> Hubei Longzhong Laboratory, Xiangyang 441000, China

<sup>e</sup> School of Materials Science and Engineering, Hanshan Normal University, Chaozhou 521041, China

\* Corresponding author: Yingqiu Zheng

E-mail: [Zhengyingqiu123@163.com](mailto:Zhengyingqiu123@163.com)

## Supplementary Figures and Table

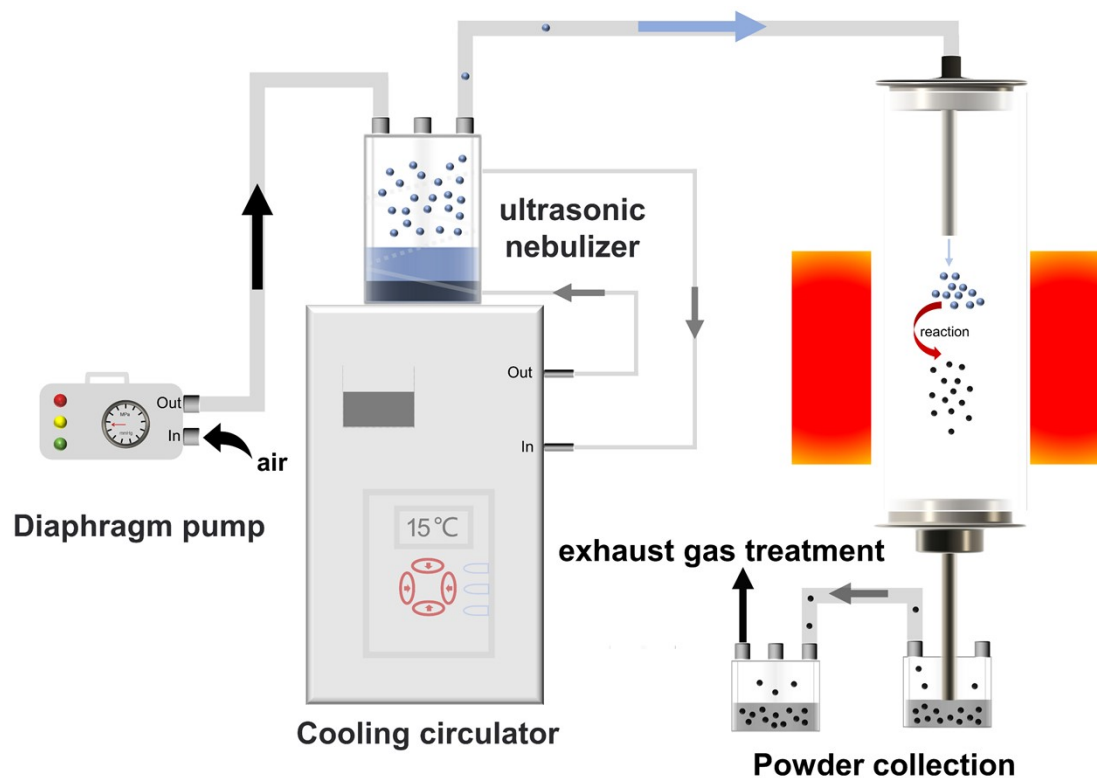

**Fig. S1** The schematic illustration of Mist-CVD for the fabrication of electrocatalysts.

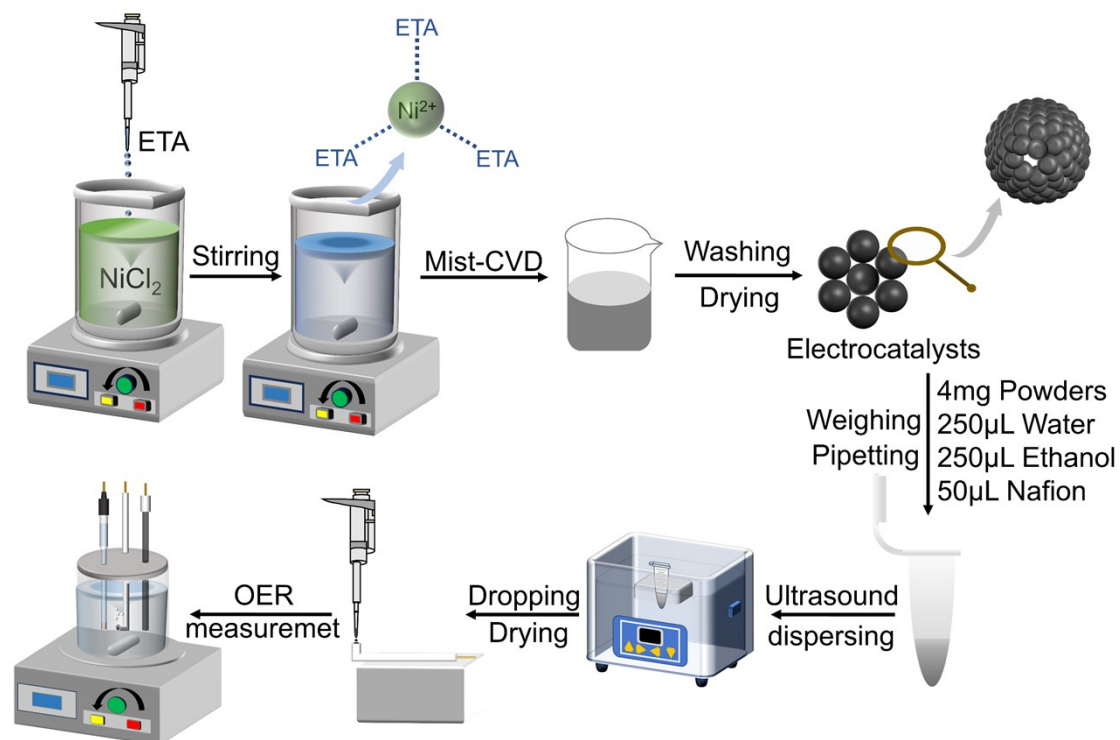

**Fig. S2** Flowchart of fabrication and OER measurement of electrocatalysts.

**Table S1** Parameters of OER performance of the electrocatalysts.

| Sample           | $\eta_{10}$<br>(mV) | Tafel slope<br>(mV dec <sup>-1</sup> ) | $C_{dl}$<br>( $\mu\text{F cm}^{-2}$ ) | ECSA<br>(cm <sup>-2</sup> ) | $R_{ct}$<br>( $\Omega$ ) | TOF<br>(S <sup>-1</sup> ) |
|------------------|---------------------|----------------------------------------|---------------------------------------|-----------------------------|--------------------------|---------------------------|
| Ni-400           | 386.0               | 117.0                                  | 223.2                                 | 5.58                        | 1.08                     | 0.0022                    |
| Ni-600           | 286.4               | 54.8                                   | 277.0                                 | 6.93                        | 0.23                     | 0.0492                    |
| Ni-800           | 350.7               | 89.3                                   | 246.7                                 | 6.17                        | 0.37                     | 0.0039                    |
| Ni-1000          | 382.5               | 91.5                                   | 231.8                                 | 5.80                        | 0.84                     | 0.0014                    |
| RuO <sub>2</sub> | 121.7               | 122.7                                  | 471.9                                 | 11.80                       | 60.76                    | 0.0382                    |

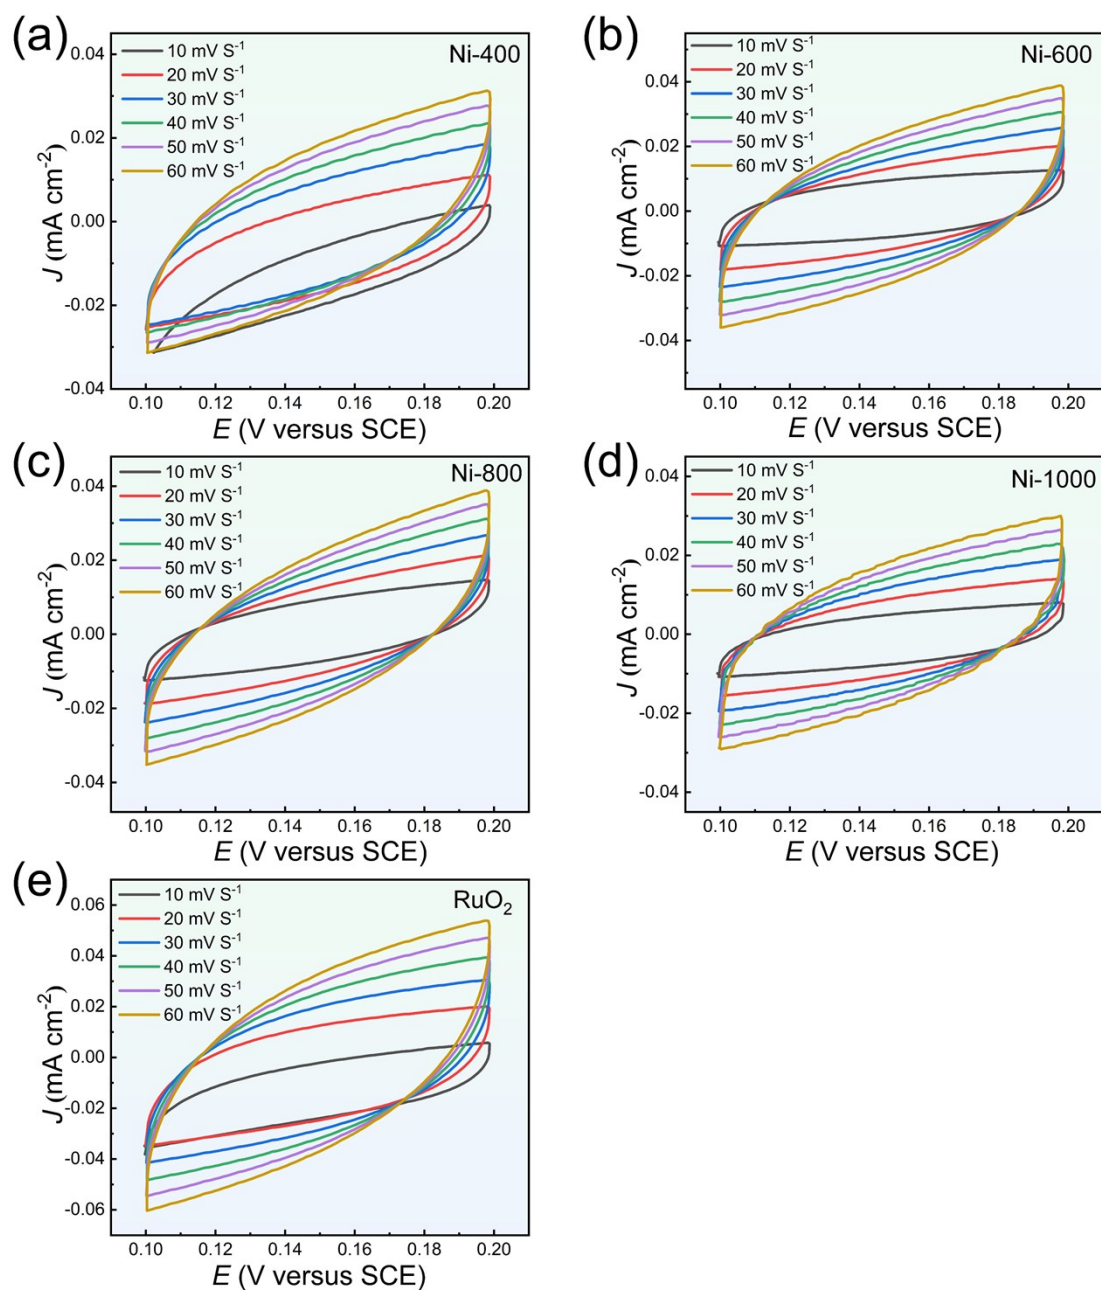

**Fig. S3** CV curves of the as-prepared electrocatalysts at different scan rates without the Faradaic process.
